# Supplementary material for: The metalloproteinase inhibitor Reck is essential for zebrafish DRG development
Source: Oxford University Press journal article supplement (doi:10.1242/dev.072439), 2012-02-02
Supplement: dev072439tables2.pdf [file dev072439tables2.pdf]

**Table S2. Apoptotic markers do not colocalize with neural crest markers**

| Injection              | <i>n</i> | DLAV (32 hpf) |        |          | Axial circulation (48 hpf) |          |          | Parachordal chain (72 hpf) |        |          | Intracranial hemorrhage (72 hpf) |        |          |
|------------------------|----------|---------------|--------|----------|----------------------------|----------|----------|----------------------------|--------|----------|----------------------------------|--------|----------|
|                        |          | Present       | Absent | <i>P</i> | Normal                     | Impaired | <i>P</i> | Present                    | Absent | <i>P</i> | Present                          | Absent | <i>P</i> |
| Control MO             | 34       | 34            | 0      | <1.00E-4 | 34                         | 0        | <0.01    | 34                         | 0      | <1.00E-4 | 34                               | 0      | <1.00E-3 |
| 3 ng <i>reck</i><br>MO | 45       | 5             | 40     |          | 34                         | 11       |          | 5                          | 40     |          | 33                               | 12     |          |

TUNEL<sup>+</sup> cells per hemisegment are presented for each genotype. In 639 TUNEL<sup>+</sup> cells counted across 35 embryos, we observed no Sox10<sup>+</sup>/TUNEL<sup>+</sup> cells.
