# Supplementary figures and images for: The metalloproteinase inhibitor Reck is essential for zebrafish DRG development
Source: Oxford University Press journal article supplement (doi:10.1242/dev.072439), 2012-02-02

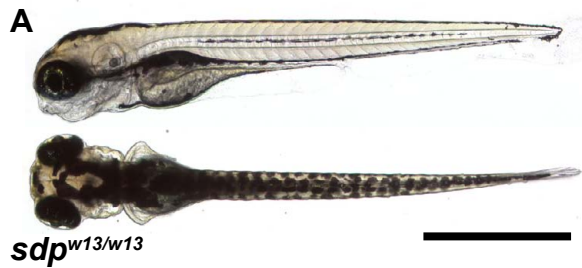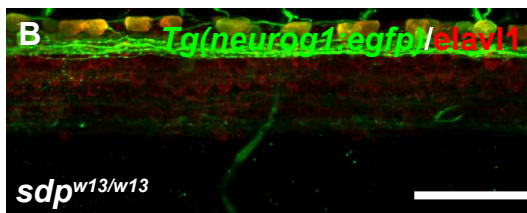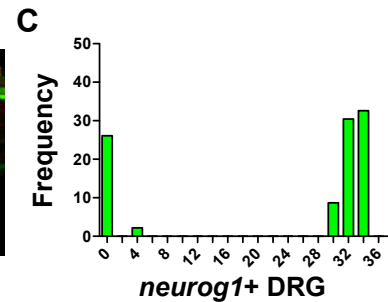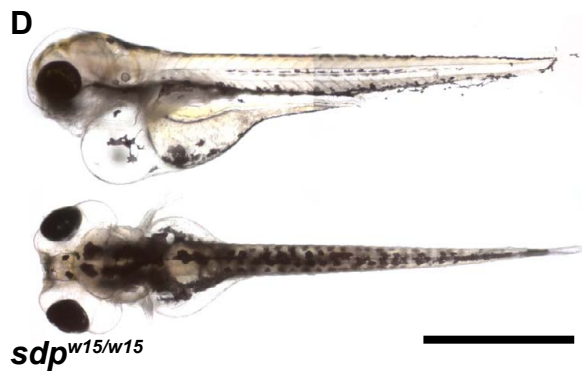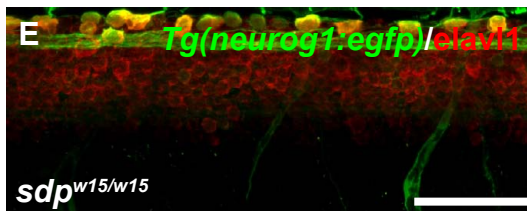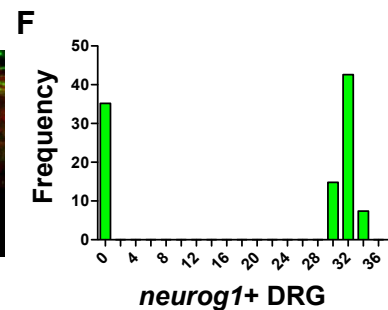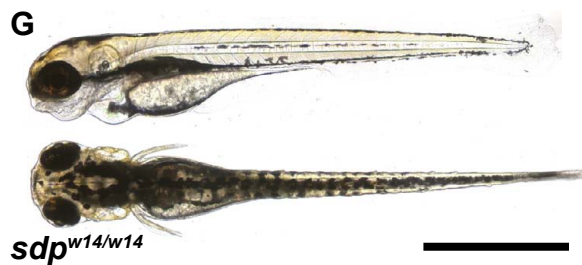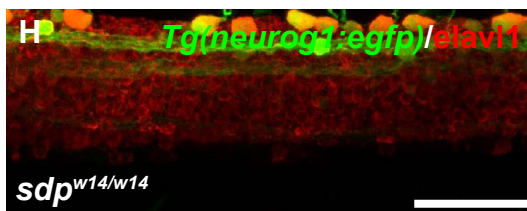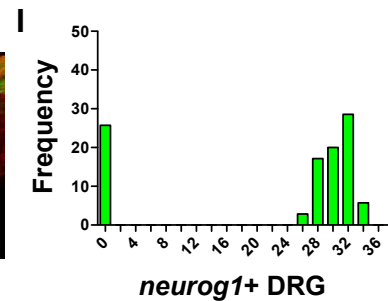

Supplement: dev072439figs1.pdf [file dev072439figs1.pdf]

*sib*

*sdp<sup>w12/w12</sup>*

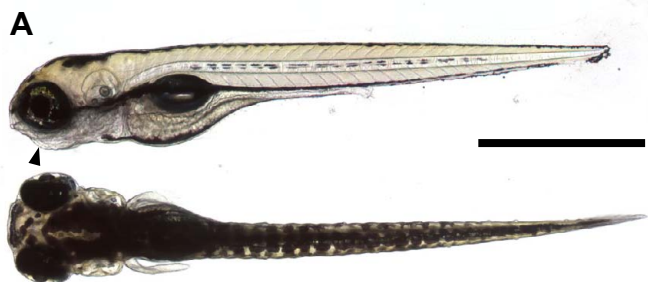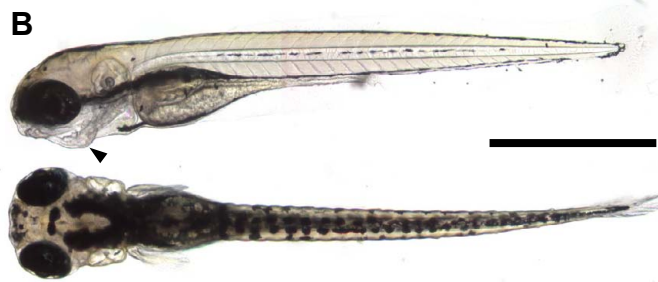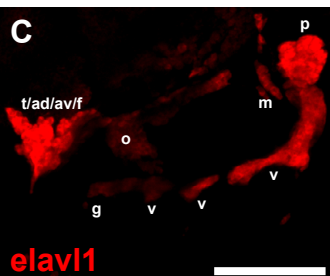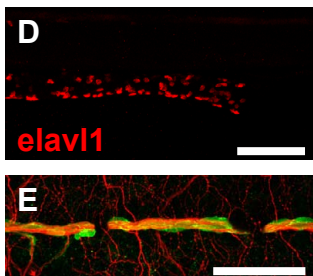

*Tg(sox10:eos)/AcT*

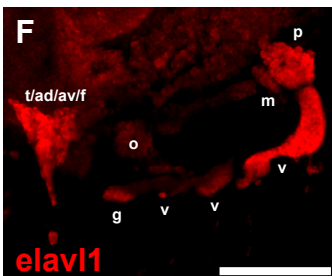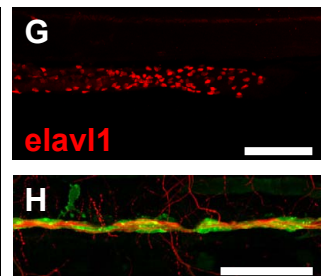

*Tg(sox10:eos)/AcT*

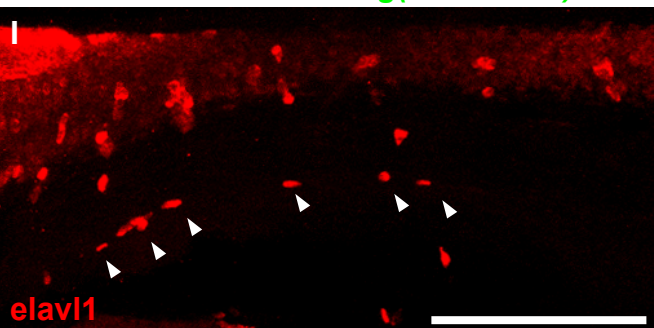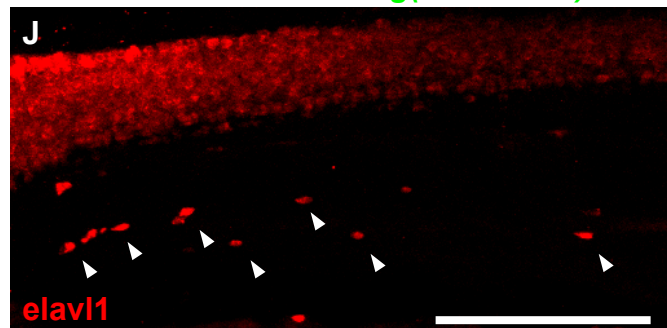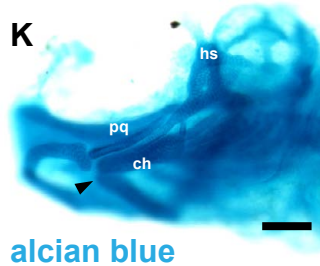

alcian blue

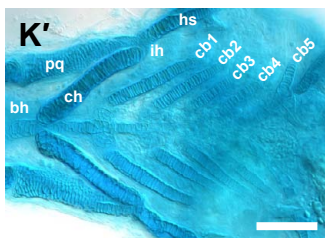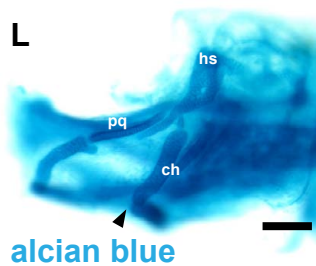

alcian blue

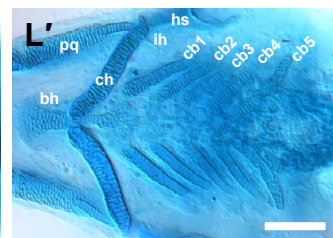

Supplement: dev072439figs2.pdf [file dev072439figs2.pdf]
